# Supplementary material
Source: PubMed Central journal article supplement (PMC5656472)
Supplement: jcsm.13.11.1235s1.pdf [file jcsm.13.11.1235s1.pdf]

## **Appendix 1.**

### Trial Executive Committee

|               |            |        |
|---------------|------------|--------|
| T. D. Bradley | Chair      | Canada |
| J.S. Floras   | Vice Chair | Canada |
| A.G. Logan    | Vice Chair | Canada |

### Steering Committee Members

|                   |        |         |
|-------------------|--------|---------|
| T. D. Bradley     | Chair  | Canada  |
| J.S. Floras       | Member | Canada  |
| A.G. Logan        | Member | Canada  |
| D.H. Delgado      | Member | Canada  |
| R.J. Kimoff       | Member | Canada  |
| S. Parthasarathy  | Member | USA     |
| G. Lorenz-Filho   | Member | Brazil  |
| S. Redolfi        | Member | France  |
| G. Parati         | Member | Italy   |
| M. Arzt           | Member | Germany |
| J. Durán Cantolla | Member | Spain   |
| T. Kasai          | Member | Japan   |

Data and Safety Monitoring Committee Members

|              |        |        |
|--------------|--------|--------|
| E.R. Smith   | Chair  | Canada |
| D. Johnstone | Member | Canada |
| R. Collins   | Member | UK     |

Event Adjudication Committee Members

|               |        |        |
|---------------|--------|--------|
| C. Joyner     | Chair  | Canada |
| J.S. Floras   | Member | Canada |
| S. Mak        | Member | Canada |
| D.H. Delgado  | Member | Canada |
| A. Al-Hesayan | Member | Canada |
| E. Oechslin   | Member | Canada |
| S. Kosuszko   | Member | Canada |

## **Appendix 2. Investigators (by country and site)**

### **Canada**

T.D. Bradley, J.S. Floras, A.G. Logan, C.M. Ryan, D.H. Delgado, S. Mak and G. Tomlinson -  
University Health Network/Mount Sinai Hospital, Toronto, ON

R.S. Leung, St Michael's Hospital, Toronto, ON.

D. Morrison, Capital District Health Authority, Halifax, NS

M. Fitzpatrick, Queen's University, Kingston, ON

P. Mayer, Hôpital Hôtel-Dieu du CHUM, Université de Montréal, Montréal QC

R.J. Kimoff, McGill University Health Center, Montréal, QC

L. Mielniczuk and R. Beanlands, University of Ottawa Heart Institute, Ottawa, ON

F. Series, Institut Universitaire de Cardiologie et de Pneumologie de Québec, Québec City, QC

J.A. Fleetham, Vancouver General Hospital, University of British Columbia, Vancouver, BC

C. Demers, Hamilton General Hospital, and A.C.P. Powles, St. Joseph's Healthcare, McMaster  
University, Hamilton, ON

C. Rinne, St Mary's General Hospital, Kitchener, ON

E. Giannouli, Misericordia Health Center, University of Manitoba, Winnipeg, MB

### **USA**

A. Dal Nogare, Glacier View Research Institute, Kalispel, MT

M. Dunlap, MetroHealth Medical Center, Case Western Reserve University, Cleveland, OH

D. Kapoor, Southern Arizona VA Health Care System, Tucson, AZ

## **Brazil**

G. Lorenzi-Filho and L. Drager, Instituto do Coração do Hospital das Clínicas da FMUSP, Sao Paulo

L.R. Bittencourt, Centro de Desenvolvimento em Estudos Clínicos Brasil, Sao Paulo

C. Amodeo, Instituto Dante Pazzanese de Cardiologia, Sao Paulo

R. P. Pedrosa, Pronto Socorro Cardiologico de Pernambuco, Recife

## **Spain**

M. Mayos Pérez, Clínica del Son (Departament de Pneumologia), Barcelona

P. Lloberes Canadell, Hospital Universitari Vall d'Hebron, Barcelona

J.F. Masa Jimenez, Hospital San Pedro Alcántara, Cáceres

F. Barbé, Hospital Arnau de Vilanova, Lleida

N.P. González Mangado, Fundación Jiménez Díaz-CAPIO, Madrid

F. Del Campo, Hospital Rio Hortega, Valladolid

J. Durán Cantolla, Hospital Universitario Txagorritxu, Vitoria

J.M. Marin Trigo, Hospital Universitario Miguel Servet, Zaragoza

M. González Martinez, Hospital Universitario Marques de Valdecilla, Santander

## **Germany**

M. Arzt, Universitaetskinikum Regensburg, Regensburg

W. Randerath, Wissenschaftliches Institut Bethanien e.V., Solingen

T. Penzel, Charite - Universitätsmedizin Berlin, Berlin

**Italy**

M.T. La Rovere, Fondazione S. Maugeri, Pavia

G. Parati, Ospedale San Luca, Milan

C. Tantucci, Ospedale “Spedali Civili” Di Brescia, Brescia

A. Braghiroli, Salvatore Maugeri Foundation, Veruno

D. Raccagni, Azienda Ospedaliera Melino Mellini Di Chiari, Chiari

**U.K.**

A. Williams, Guy’s and St. Thomas’ NHS Trust, London
